# Supplementary material for: Bridged o-carborane–anthracene dyads as dual state emission luminogens: synthesis, characterization, and mechanochromic properties
Source: Royal Society of Chemistry journal article supplement (doi:10.1039/d3nj00027c), 2023-01-01
Supplement: d3nj00027c1.pdf [file d3nj00027c1.pdf]

## Electronic Supplementary Material (ESI) for New Journal of Chemistry.

### Bridged *o*-carborane-anthracene dyads as dual state emission luminogens: synthesis, characterization, and mechanochromic property

Chunyue Xu<sup>a</sup>, Tianrui Li<sup>a</sup>, Jinling Miao<sup>\*b</sup>, Kexin Liu<sup>b</sup>, Yong Nie<sup>\*a</sup>, Guangning Liu<sup>b</sup>, Xuchuan Jiang<sup>\*a,c</sup>

<sup>a</sup>Institute for Smart Materials & Engineering, University of Jinan, No. 336 Nanxin Zhuang West Road, 250022 Jinan, P. R. China

<sup>b</sup>School of Chemistry and Chemical Engineering, Shandong Provincial Key Laboratory of Fluorine Chemistry and Chemical Materials, University of Jinan, 250022 Jinan, P. R. China

<sup>c</sup>School of Materials Science and Engineering, University of Jinan, 250022 Jinan, P. R. China

### Contents

#### Experimental section

**Table S1** Crystal data and structure refinement for **2**

**Table S2** Selected bond lengths and torsion angles for **2**

**Fig. S1** Structures of **1** and **2** optimized at the B3LYP/6-31G (d,p) level of theory

**Table S3** Selected bond lengths, bond angles and torsion angles of the optimized structures of **1** and **2**

**Fig. S2** Absorption spectrum of **1** in CH<sub>2</sub>Cl<sub>2</sub> by DFT calculation

**Fig. S3** Absorption spectrum of **2** in CH<sub>2</sub>Cl<sub>2</sub> by DFT calculation

**Table S4** Computed excitation energies and oscillator strengths for **1** from TD-DFT calculations in CH<sub>2</sub>Cl<sub>2</sub>

**Table S5** Computed excitation energies and oscillator strengths for **2** from TD-DFT calculations in CH<sub>2</sub>Cl<sub>2</sub>

**Table S6** Emission lifetime data of solid samples

**Fig. S4** PL decay curve of **1** ( $\lambda_{\text{ex}} = 380$  nm,  $\lambda_{\text{em}} = 522$  nm)

**Fig. S5** PL decay curve of **2** (a)  $\lambda_{\text{ex}} = 380$  nm,  $\lambda_{\text{em}} = 448$  nm; b)  $\lambda_{\text{ex}} = 380$  nm,  $\lambda_{\text{em}} = 518$  nm)

**Fig. S6** CIE 1931 chromaticity diagram of **1** and **2**

**Fig. S7** FT-IR spectrum of **2** (KBr pellet)

**Fig. S8** <sup>1</sup>H-NMR spectrum of **2** in CDCl<sub>3</sub>

**Fig. S9** <sup>13</sup>C-NMR spectrum of **2** in CDCl<sub>3</sub>

**Fig. S10** <sup>11</sup>B{<sup>1</sup>H}-NMR spectrum of **2** in CH<sub>2</sub>Cl<sub>2</sub>

**Fig. S11** FT-IR spectrum of silica gel composite of **1**

**Fig. S12** FT-IR spectrum of silica gel composite of **2**

## Experimental section

Standard Schlenk techniques were used for the synthetic reaction under Ar. The solvents were commercially available and used without further purification. IR spectra were recorded in the range 450-4000  $\text{cm}^{-1}$  on a Perkin Elmer Tensor II spectrometer using KBr pellets.  $^1\text{H}$ - and  $^{13}\text{C}$ -NMR analyses were performed using a Bruker Avance III 600 MHz spectrometer. As internal references for  $^1\text{H}$ - and  $^{13}\text{C}$ -NMR spectroscopy the signals of  $\text{CDCl}_3$  were used and calculated relative to tetramethylsilane (TMS).  $^{11}\text{B}$ -NMR spectrum was recorded in dichloromethane solutions ( $\text{D}_2\text{O}$  was added for locking) on a Bruker AVANCE III 500 spectrometer. Melting points were measured with a SGW X-4 apparatus and are not corrected. The high resolution mass spectrum was measured with a Thermo Scientific Q Exactive HF Orbitrap-FTMS instrument (AP-MALDI positive ion mode). UV-Vis spectra were recorded using a UV-9000S spectrometer. Emission spectra were measured with an Edinburgh FLS920 fluorimeter using a front-face solid sample configuration for solid samples. Absolute fluorescence quantum yields were obtained using an integrating sphere.

## Synthesis of compound 2

Under argon atmosphere, compound **1** (80.1 mg, 0.23 mmol) was added into a Schlenk flask, cooled in ice-water bath, and sodium borohydride (18.9 mg, 0.50 mmol; added in three batches) and 30 mL of cold THF (kept in the refrigerator for about 3 h), and stirred to produce a yellow solution. After 30 min, the ice-water bath was removed and the solution was stirred at room temperature for 30 min, which turned pale yellow. After cooling in ice-water bath again, it was quenched the reaction with dilute hydrochloric acid (30 mL, 1  $\text{mol}\cdot\text{L}^{-1}$ ). The aqueous phase was extracted with dichloromethane (20 mL  $\times$  5), the organic phases were combined, dried with anhydrous sodium sulfate, filtered, and the filtrate was dried under reduced pressure to obtain a crude product, which was separated by preparative thin layer chromatography (eluent *n*-hexane/dichloromethane = 2/1, *V/V*) to obtain the pale yellow solid **2**.

**2**: 71.6 mg, yield: 89.2%;  $R_f$  = 0.70 (*n*-hexane: dichloromethane = 2: 1, *V/V*); m.p. 185.5  $^\circ\text{C}$ ; IR (KBr):  $\nu$  = 3361 (N-H), 3060, 2920 (C-H), 2586 (B-H), 1453, 1260 (C-N), 1071, 885, 728  $\text{cm}^{-1}$ ;  $^1\text{H}$ -NMR (600 MHz,  $\text{CDCl}_3$ ):  $\delta$  = 8.47 (s, 1H, ArH), 8.11 (d,  $J$  = 8.9 Hz, 2H, ArH), 8.03 (d,  $J$  = 8.4 Hz, 2H, ArH), 7.62 ~ 7.55 (m, 2H, ArH), 7.53 ~ 7.47 (m, 2H, ArH), 4.93 (s, 2H,  $\text{CH}_2$ ), 3.96 (s, 1H,

C<sub>cage</sub>H), 2.93 (s, 1H, NH); <sup>13</sup>C NMR (151 MHz, CDCl<sub>3</sub>): δ = 131.41, 130.18, 129.39, 128.67, 127.02, 126.91, 125.25, 123.02, 93.79, 69.33, 45.47; <sup>11</sup>B NMR (128 MHz, CH<sub>2</sub>Cl<sub>2</sub>) δ -3.24 (1B), -10.10 (1B), -11.55 (4B), -13.47 (2B), -14.21 (2B); MALDI-MS: *m/z* (%): calcd. for C<sub>17</sub>B<sub>10</sub>H<sub>23</sub>N, 351.2756 [M]<sup>+</sup>, found 351.2749.

**Table S1** Crystal data and structure refinement for **2**

|                                             |                                                                |
|---------------------------------------------|----------------------------------------------------------------|
| Empirical formula                           | C <sub>68</sub> H <sub>92</sub> B <sub>40</sub> N <sub>4</sub> |
| Formula weight                              | 1397.85                                                        |
| Temperature/K                               | 293                                                            |
| Crystal system                              | orthorhombic                                                   |
| Space group                                 | Pna2 <sub>1</sub>                                              |
| a/Å                                         | 24.8057(6)                                                     |
| b/Å                                         | 15.1639(4)                                                     |
| c/Å                                         | 21.0939(6)                                                     |
| α/°                                         | 90                                                             |
| β/°                                         | 90                                                             |
| γ/°                                         | 90                                                             |
| Volume/Å <sup>3</sup>                       | 7934.5(4)                                                      |
| Z                                           | 4                                                              |
| ρ <sub>calc</sub> /cm <sup>3</sup>          | 1.170                                                          |
| μ/mm <sup>-1</sup>                          | 0.060                                                          |
| F(000)                                      | 2912.0                                                         |
| Crystal size/mm <sup>3</sup>                | 0.65 × 0.44 × 0.41                                             |
| Radiation                                   | MoKα (λ = 0.71073)                                             |
| 2θ range for data collection/°              | 7.00 to 54.12                                                  |
| Index ranges                                | -26 ≤ h ≤ 30, -18 ≤ k ≤ 18, -25 ≤ l ≤ 25                       |
| Reflections collected                       | 65154                                                          |
| Independent reflections                     | 14730 [R <sub>int</sub> = 0.0462, R <sub>sigma</sub> = 0.0405] |
| Data/restraints/parameters                  | 14730/1/1009                                                   |
| Goodness-of-fit on F <sup>2</sup>           | 1.013                                                          |
| Final R indexes [I ≥ 2σ (I)]                | R <sub>1</sub> = 0.0686, wR <sub>2</sub> = 0.1613              |
| Final R indexes [all data]                  | R <sub>1</sub> = 0.1145, wR <sub>2</sub> = 0.1947              |
| Largest diff. peak/hole / e Å <sup>-3</sup> | 0.26/-0.25                                                     |
| CCDC deposition number                      | 2160410                                                        |

**Table S2** Selected bond lengths and torsion angles for **2**

| bond lengths (Å) |            | bond angles [°] |           | torsion angles [°] |         |
|------------------|------------|-----------------|-----------|--------------------|---------|
| C1-C2            | 1.707 (8)  | C1-C2-N1        | 120.9 (5) | C1-C2-N1-C3        | -59.81  |
| C2-N1            | 1.408 (6)  | C2-N1-C3        | 120.1 (4) | C2-N1-C3-C4        | -170.15 |
| N1-C3            | 1.453 (6)  | N1-C3-C4        | 111.9 (5) | N1-C3-C4-C5        | 89.57   |
| C3-C4            | 1.528 (8)  | C3-C4-C5        | 119.7 (6) | N1-C3-C4-C17       | -94.44  |
| C4-C5            | 1.411 (10) | C3-C4-C17       | 119.4 (7) | C18-C19-N2-C20     | 104.62  |
| C4-C17           | 1.404 (9)  | C18-C19-N2      | 115.9 (4) | C35-C36-N3-C37     | -103.18 |
| C18-C19          | 1.722 (7)  | C19-N2-C20      | 120.0 (4) | C52-C53-N4-C54     | 113.94  |
| C19-N2           | 1.408 (6)  | C35-C36-N3      | 116.8 (4) |                    |         |
| N2-C20           | 1.463 (6)  | C36-N3-C37      | 119.7 (4) |                    |         |
| C35-C36          | 1.696 (7)  | C52-C53-N4      | 119.1 (4) |                    |         |
| C36-N3           | 1.403 (6)  | C53-N4-C54      | 120.5 (4) |                    |         |
| N3-C37           | 1.478 (6)  |                 |           |                    |         |
| C52-C53          | 1.704 (7)  |                 |           |                    |         |
| C53-N4           | 1.390 (6)  |                 |           |                    |         |
| N4-C54           | 1.462 (7)  |                 |           |                    |         |

**Reference for the Gaussian package for the DFT calculations:**

M. J. Frisch, G. W. Trucks, H. B. Schlegel, G. E. Scuseria, M. A. Robb, J. R. Cheeseman, G. Scalmani, V. Barone, B. Mennucci, G. A. Petersson, H. Nakatsuji, M. Caricato, X. Li, H. P. Hratchian, A. F. Izmaylov, J. Bloino, G. Zheng, J. L. Sonnenberg, M. Hada, M. Ehara, K. Toyota, R. Fukuda, J. Hasegawa, M. Ishida, T. Nakajima, Y. Honda, O. Kitao, H. Nakai, T. Vreven, J. A. Montgomery, Jr., J. E. Peralta, F. Ogliaro, M. Bearpark, J. J. Heyd, E. Brothers, K. N. Kudin, V. N. Staroverov, R. Kobayashi, J. Normand, K. Raghavachari, A. Rendell, J. C. Burant, S. S. Iyengar, J. Tomasi, M. Cossi, N. Rega, J. M. Millam, M. Klene, J. E. Knox, J. B. Cross, V. Bakken, C. Adamo, J. Jaramillo, R. Gomperts, R. E. Stratmann, O. Yazyev, A. J. Austin, R. Cammi, C. Pomelli, J. W. Ochterski, R. L. Martin, K. Morokuma, V. G. Zakrzewski, G. A. Voth, P. Salvador, J. J. Dannenberg, S. Dapprich, A. D. Daniels, O. Farkas, J. B. Foresman, J. V. Ortiz, J. Cioslowski, and D. J. Fox, Gaussian 09, Revision A.02, Gaussian, Inc., Wallingford CT, 2009.

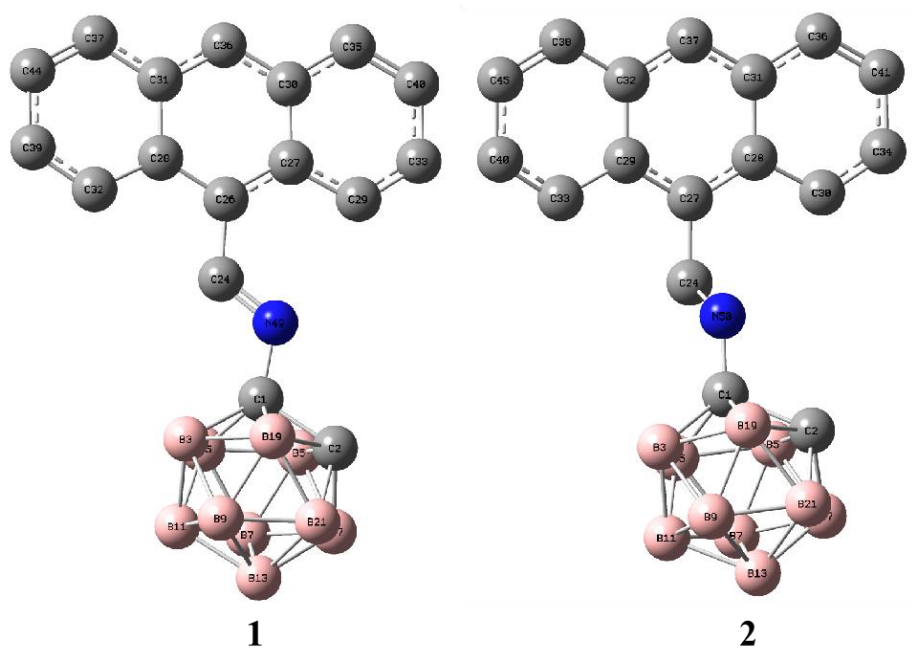

**Fig. S1** Structures of **1** and **2** optimized at the B3LYP/6-31G (d,p) level of theory

**Table S3** Selected bond lengths/angles and torsion angles of the optimized structures of **1** and **2**

| Compounds | bond lengths (Å) |       | Bond angles [°] |        | torsion angles [°] |         |
|-----------|------------------|-------|-----------------|--------|--------------------|---------|
| <b>1</b>  | C1-C2            | 1.648 | C2-C1-N49       | 113.24 | C2-C1-N49-C24      | -177.55 |
|           | C1-N40           | 1.417 | C1-N49-C24      | 118.49 | C1-N49-C24-C26     | -178.84 |
|           | N40-C24          | 1.287 | N49-C24-C26     | 125.68 | N49-C24-C26-C27    | 25.09   |
|           | C24-C26          | 1.465 | C24-C26-C27     | 123.14 | N49-C24-C26-C28    | -157.80 |
|           | C26-C28          | 1.430 | C24-C26-C28     | 116.70 |                    |         |
|           | C26-C27          | 1.429 |                 |        |                    |         |
| <b>2</b>  | C1-C2            | 1.708 | C1-C2-N50       | 115.47 | C2-C1-N50-C24      | 125.44  |
|           | C1-N50           | 1.411 | C1-N50-C24      | 119.87 | C1-N50-C24-C27     | 117.80  |
|           | N50-C24          | 1.478 | N50-C24-C27     | 110.03 | N50-C24-C27-C28    | 85.17   |
|           | C24-C27          | 1.515 | C24-C27-C28     | 119.87 | N50-C24-C27-C29    | -105.06 |
|           | C27-C28          | 1.416 | C24-C27-C29     | 119.86 |                    |         |
|           | C27-C29          | 1.416 |                 |        |                    |         |

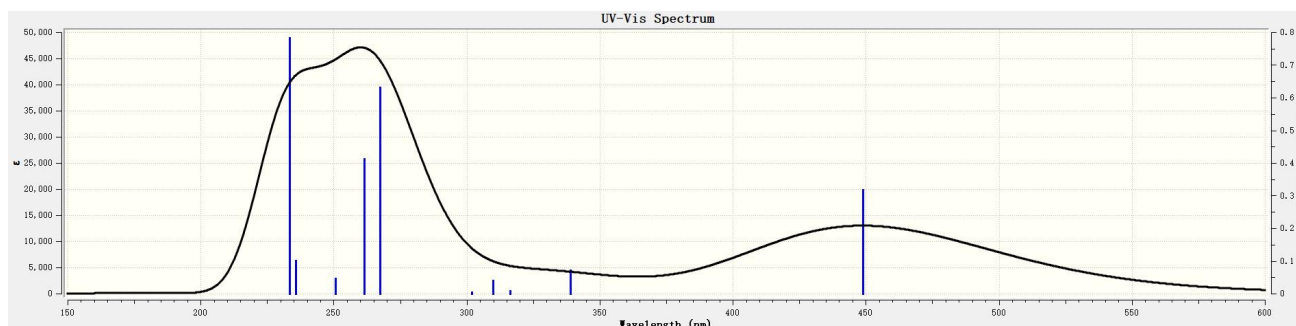

Fig. S2 Absorption spectrum of **1** in  $\text{CH}_2\text{Cl}_2$  by DFT calculation

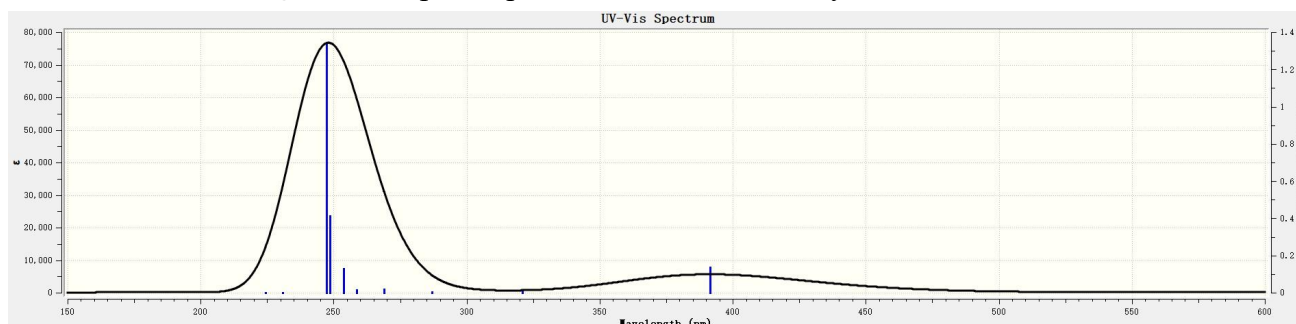

Fig. S3 Absorption spectrum of **2** in  $\text{CH}_2\text{Cl}_2$  by DFT calculation

Table S4 Computed excitation energies and oscillator strengths for **1** from TD-DFT calculations in

$\text{CH}_2\text{Cl}_2^a$

| state | E (ev) | $\lambda$ (nm) | $f$    | transitions                                                                                         |
|-------|--------|----------------|--------|-----------------------------------------------------------------------------------------------------|
| 1     | 2.7617 | 448.95         | 0.3189 | HOMO→LUMO (99.0%)                                                                                   |
| 2     | 3.6582 | 338.92         | 0.0711 | HOMO - 1→LUMO (75.5%)<br>HOMO→LUMO + 2 (22.4%)                                                      |
| 3     | 3.9200 | 316.28         | 0.0092 | HOMO - 3→LUMO (10.8%)<br>HOMO - 2→LUMO (85.7%)                                                      |
| 4     | 4.000  | 309.96         | 0.0408 | HOMO→LUMO + 1 (95.7%)                                                                               |
| 5     | 4.1068 | 301.90         | 0.0034 | HOMO - 3→LUMO (84.0%)<br>HOMO - 3→LUMO + 1 (2.1%)<br>HOMO - 2→LUMO (11.2%)                          |
| 6     | 4.6532 | 267.48         | 0.6324 | HOMO - 4→LUMO (9.8%)<br>HOMO - 1→LUMO (17.4%)<br>HOMO - 1→LUMO + 1 (15.7%)<br>HOMO→LUMO + 2 (54.6%) |
| 7     | 4.7439 | 261.35         | 0.4132 | HOMO - 4→LUMO (84.4%)<br>HOMO - 1→LUMO + 1 (2.2%)<br>HOMO→LUMO + 2 (5.8%)                           |
| 8     | 4.9446 | 250.75         | 0.0454 | HOMO - 2→LUMO + 1 (2.9%)<br>HOMO→LUMO + 2 (2.0%)<br>HOMO→LUMO + 3 (89.5%)                           |

|    |        |        |        |                                                                                                                                   |
|----|--------|--------|--------|-----------------------------------------------------------------------------------------------------------------------------------|
| 9  | 5.2615 | 235.64 | 0.1020 | HOMO - 1→LUMO + 1 (11.7%)<br>HOMO→LUMO + 2 (2.1%)<br>HOMO→LUMO + 4 (79.6%)                                                        |
| 10 | 5.3123 | 233.39 | 0.7832 | HOMO - 3→LUMO + 1 (2.7%)<br>HOMO - 2→LUMO + 1 (2.5%)<br>HOMO - 1→LUMO(2.8%)<br>HOMO - 1→LUMO + 1 (61.7%)<br>HOMO→LUMO + 2 (11.0%) |

<sup>a</sup> calculated at the B3LYP/6-31G (d,p) level of theory.

**Table S5** Computed excitation energies and oscillator strengths for **2** from TD-DFT calculations in

| CH <sub>2</sub> Cl <sub>2</sub> <sup>a</sup> |        |        |          |                                                                                                                                               |
|----------------------------------------------|--------|--------|----------|-----------------------------------------------------------------------------------------------------------------------------------------------|
| state                                        | E (ev) | λ (nm) | <i>f</i> | transitions                                                                                                                                   |
| 1                                            | 3.1666 | 391.54 | 0.1365   | HOMO→LUMO (98.5%)                                                                                                                             |
| 2                                            | 3.8632 | 320.94 | 0.0068   | HOMO - 1→LUMO (56.6%)<br>HOMO→LUMO + 1 (42.5%)                                                                                                |
| 3                                            | 4.3226 | 286.83 | 0.0040   | HOMO - 2→LUMO (89.9%)<br>HOMO - 1→LUMO (3.4%)<br>HOMO→LUMO + 1 (2.2%)<br>HOMO→LUMO + 4 (2.2%)                                                 |
| 4                                            | 4.6104 | 268.92 | 0.0192   | HOMO - 3→LUMO (75.3%)<br>HOMO→LUMO + 3 (9.5%)<br>HOMO→LUMO + 4 (11.3%)                                                                        |
| 5                                            | 4.7944 | 258.60 | 0.0147   | HOMO→LUMO + 2 (97.6%)                                                                                                                         |
| 6                                            | 4.8877 | 253.67 | 0.1274   | HOMO - 3→LUMO (8.8%)<br>HOMO - 2→LUMO (4.2%)<br>HOMO - 1→LUMO (3.0%)<br>HOMO→LUMO + 1 (5.4%)<br>HOMO→LUMO + 3 (73.8%)<br>HOMO→LUMO + 4 (2.1%) |
| 7                                            | 4.9869 | 248.62 | 0.4133   | HOMO - 3→LUMO (12.5%)<br>HOMO - 1→LUMO (9.1%)<br>HOMO→LUMO + 1 (14.7%)<br>HOMO→LUMO + 4 (60.9%)                                               |
| 8                                            | 5.0149 | 247.23 | 1.3450   | HOMO - 2→LUMO (4.5%)<br>HOMO - 1→LUMO (25.8%)<br>HOMO→LUMO + 1 (32.8%)<br>HOMO→LUMO + 3 (12.8%)<br>HOMO→LUMO + 4 (21.8%)                      |

|    |        |        |        |                                                                                                                                                                                        |
|----|--------|--------|--------|----------------------------------------------------------------------------------------------------------------------------------------------------------------------------------------|
| 9  | 5.3698 | 230.89 | 0.0004 | HOMO - 4→LUMO (45.4%)<br>HOMO→LUMO + 5 (2.4%)<br>HOMO→LUMO + 6 (3.4%)<br>HOMO→LUMO + 7 (46.0%)                                                                                         |
| 10 | 5.5257 | 224.38 | 0.0016 | HOMO - 5→LUMO (21.4%)<br>HOMO - 3→LUMO + 1 (8.3%)<br>HOMO - 2→LUMO + 1 (41.6%)<br>HOMO - 1→LUMO + 3 (7.0%)<br>HOMO -1→LUMO + 4 (11.0%)<br>HOMO→LUMO + 5 (3.2%)<br>HOMO→LUMO + 9 (4.4%) |

<sup>a</sup> calculated at the B3LYP/6-31G (d,p) level of theory.

**Table S6.** Emission lifetime data of solid samples

| Compounds            | $\tau_1$ (ns) | percent | $\tau_2$ (ns) | percent | $\tau_3$ (ns) | percent | $\tau$ (ns) |
|----------------------|---------------|---------|---------------|---------|---------------|---------|-------------|
| <b>1</b>             | 0.8416        | 81.49   | 1.7116        | 18.51   |               |         | 1.00        |
| <b>2<sup>a</sup></b> | 0.3974        | 35.41   | 1.5566        | 58.59   | 5.9336        | 6.00    | 1.41        |
| <b>2<sup>b</sup></b> | 7.0730        | 59.02   | 14.4062       | 40.98   |               |         | 10.08       |

a:  $\lambda_{em} = 448$  nm; b:  $\lambda_{em} = 518$  nm

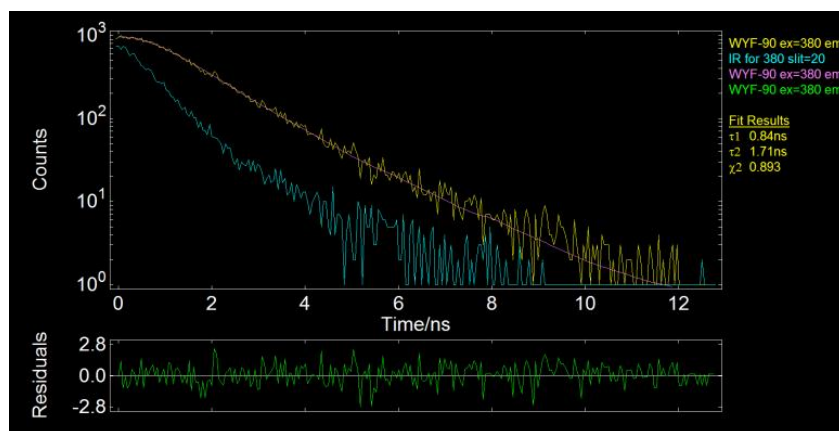

**Fig. S4** PL decay curve of **1** ( $\lambda_{ex} = 380$  nm,  $\lambda_{em} = 522$  nm)



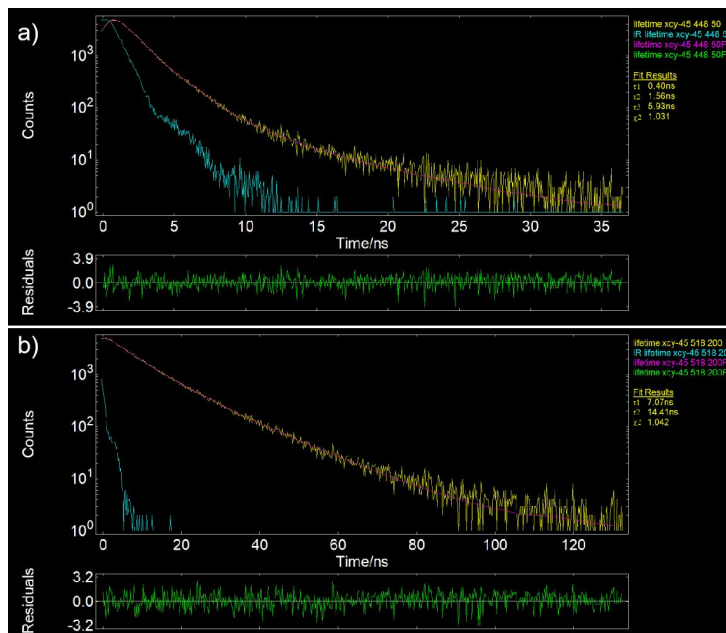

**Fig. S5** PL decay curve of **2** (a):  $\lambda_{ex} = 380$  nm,  $\lambda_{em} = 448$  nm; b):  $\lambda_{ex} = 380$  nm,  $\lambda_{em} = 518$  nm)

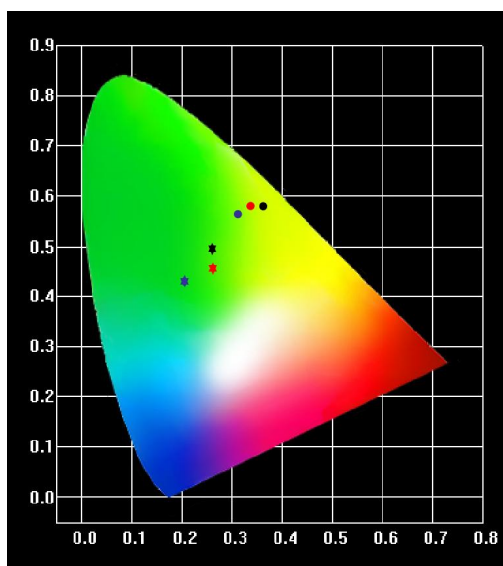

**Fig. S6** CIE 1931 chromaticity diagram of **1** and **2** (solid circles represent **1** and pentacles represent **2**; powder: black; ground sample: blue; ground then annealed: red)

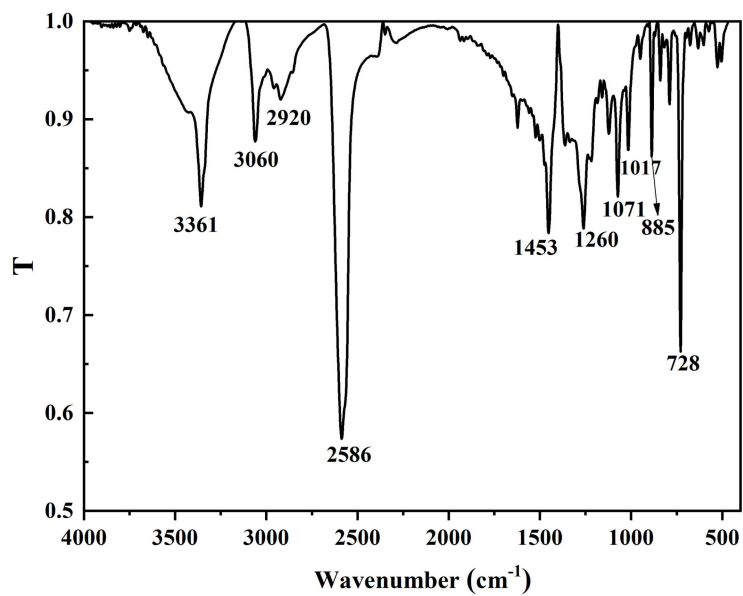

**Fig. S7** FT-IR spectrum of **2** (KBr pellet)

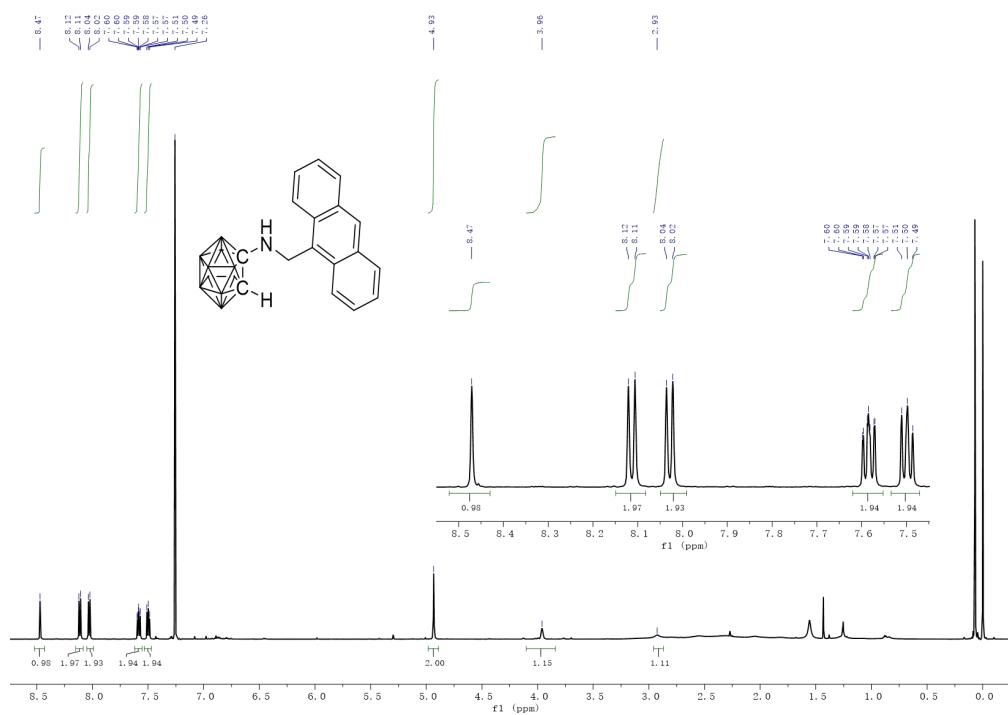

**Fig. S8**  $^1\text{H-NMR}$  spectrum of **2** in  $\text{CDCl}_3$

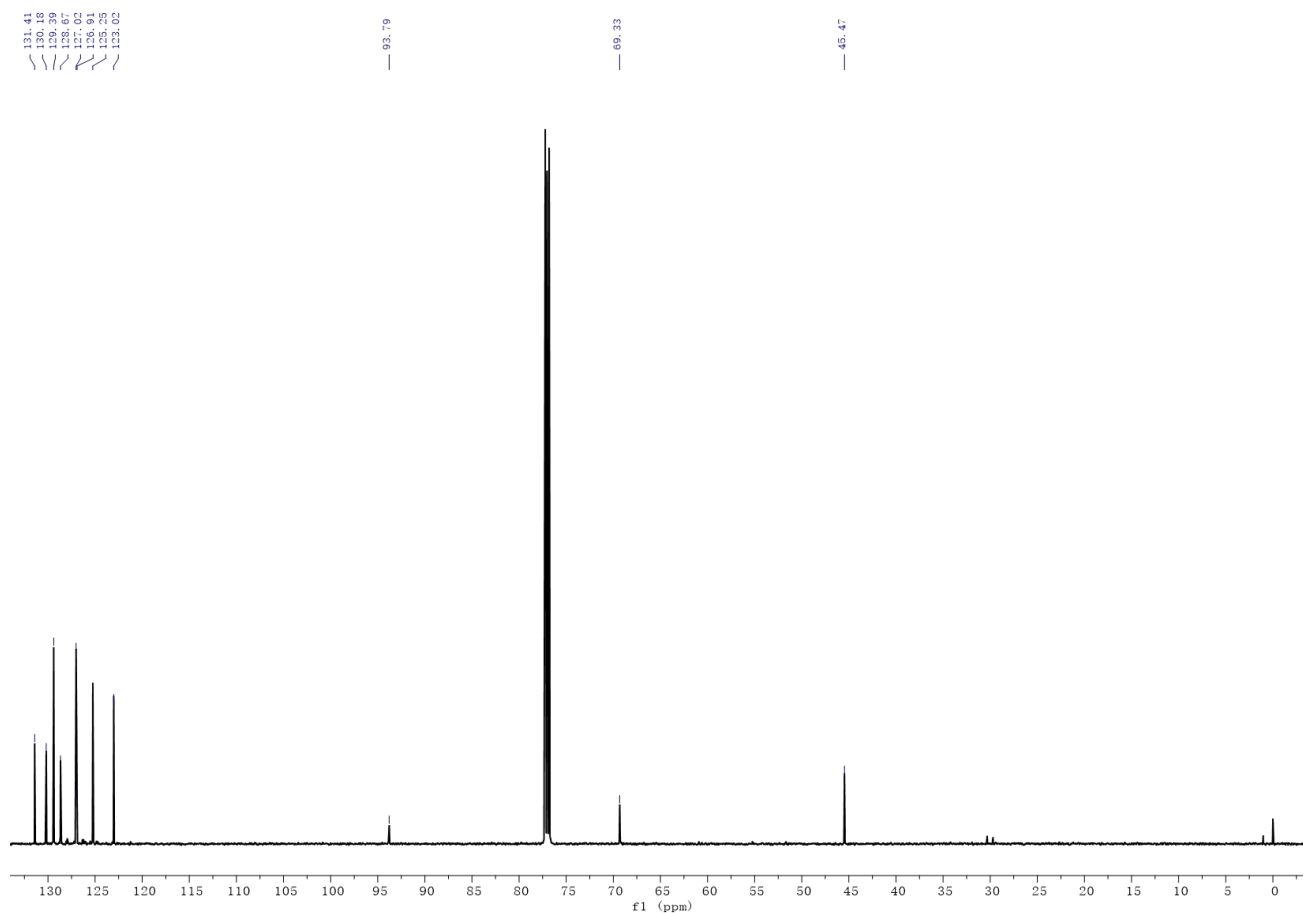

**Fig. S9**  $^{13}\text{C}$ -NMR spectrum of **2** in  $\text{CDCl}_3$

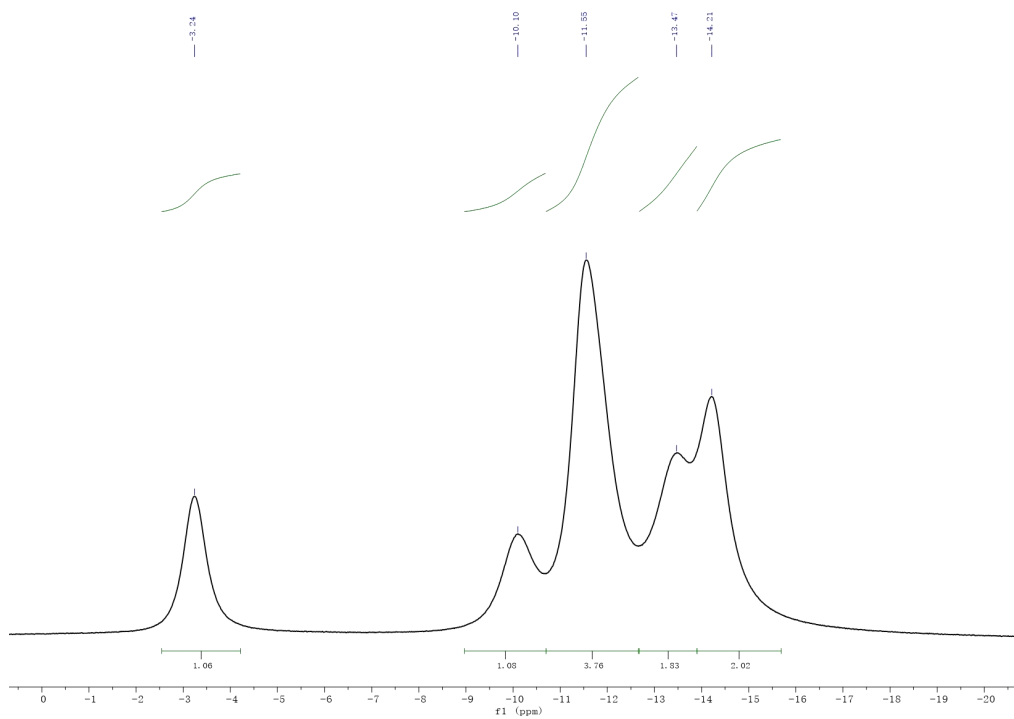

**Fig. S10**  $^{11}\text{B}\{^1\text{H}\}$ -NMR spectrum of **2** in  $\text{CH}_2\text{Cl}_2$

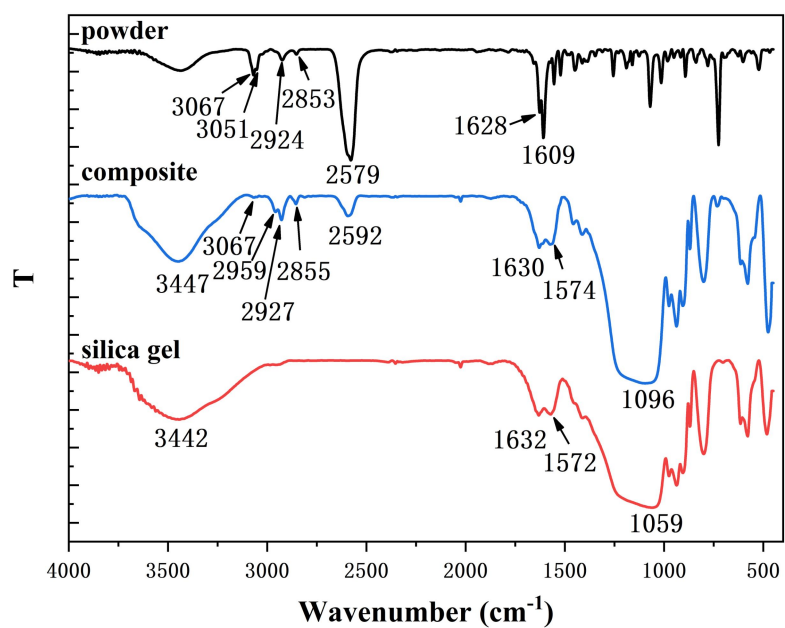

**Fig. S11** FT-IR spectrum of the silica gel composite of **1**

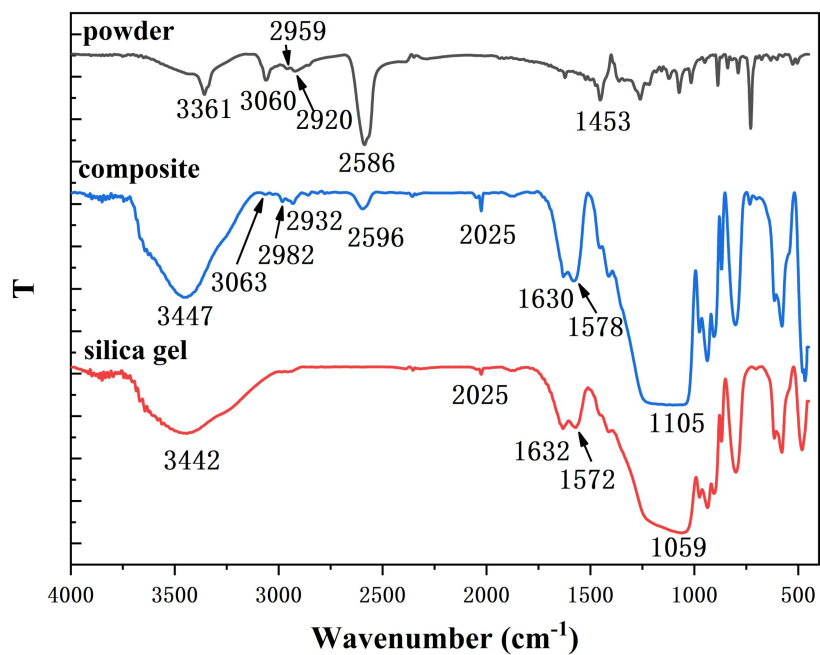

**Fig. S12** FT-IR spectrum of the silica gel composite of **2**
